# Supplementary material
Source: PubMed Central journal article supplement (PMC5526817)
Supplement: 13142_2017_481_MOESM1_ESM.pdf [file 13142_2017_481_MOESM1_ESM.pdf]

## Enrollment

Assessed for eligibility (n =558)

Excluded (n =239)  
Ineligible (n = 125)  
Declined to participate (n = 58)  
Did not complete baseline (n = 54)  
Other reasons (n = 2)

Randomized (n =319)

## Allocation

Randomized & received gain-framed message (n =105)

Randomized & received loss-framed message (n =106)

Randomized & received neutral message (n =108)

## Follow-Up

Lost to follow-up (n = 13)

Lost to follow-up (n = 15)

Lost to follow-up (n = 12)

## Analyzed

Analyzed (n = 92)

Analyzed (n = 91)

Analyzed (n =96)
